# Supplementary material for: Stem Cell Intrinsic Hexosamine Metabolism Regulates Intestinal Adaptation to Nutrient Content
Source: PubMed Central journal article supplement (PMC6179903; doi:10.1016/j.devcel.2018.08.011), 2018-10-08
Supplement: mmc1.pdf [file mmc1.pdf]

**Developmental Cell, Volume 47**

**Supplemental Information**

**Stem Cell Intrinsic Hexosamine Metabolism**

**Regulates Intestinal Adaptation**

**to Nutrient Content**

**Jaakko Mattila, Krista Kokki, Ville Hietakangas, and Michael Boutros**

FIGURE S1 related to figure 2

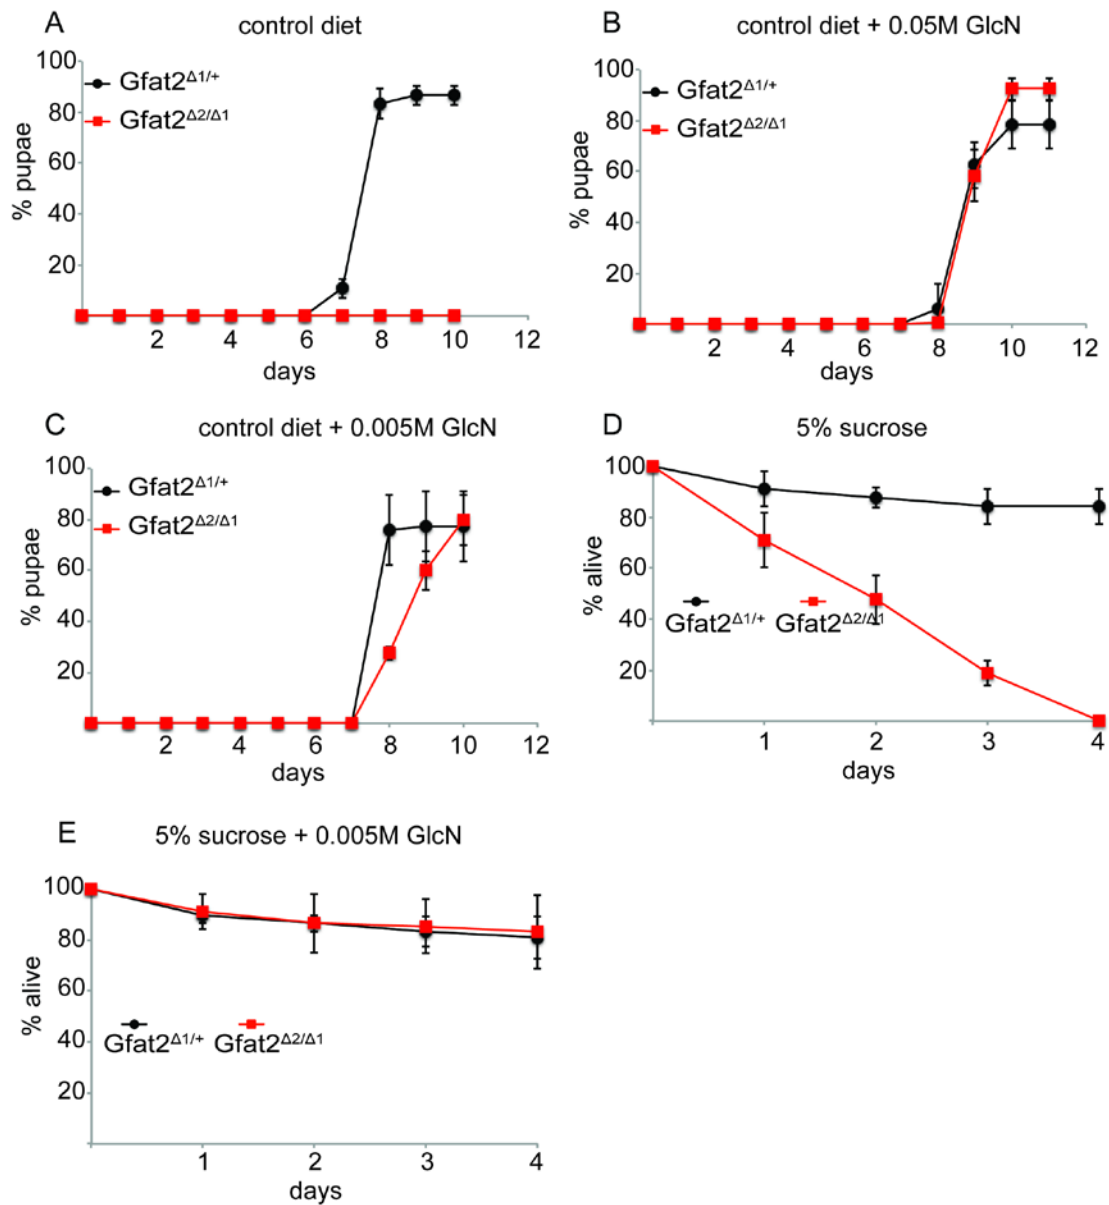

**Figure S1. *gfat2* mutant lethality is rescued by GlcNAc feeding. Related to Figure 2.**

(A-C) Pupation curves of *gfat2*<sup>Δ1/Δ2</sup> trans-heterozygote and *gfat2*<sup>Δ1/+</sup> controls fed in control (A) and GlcNAc supplemented diets (B & C). (D-E) Lethality of *gfat2*<sup>Δ1/Δ2</sup> trans-heterozygote and *gfat2*<sup>Δ1/+</sup> control first instar larvae in 5% sucrose (D) and 5% sucrose supplemented with GlcNAc (E). Error bars are standard deviation of the mean from three replicate experiments conducted in parallel.

FIGURE S2 related to figure 2

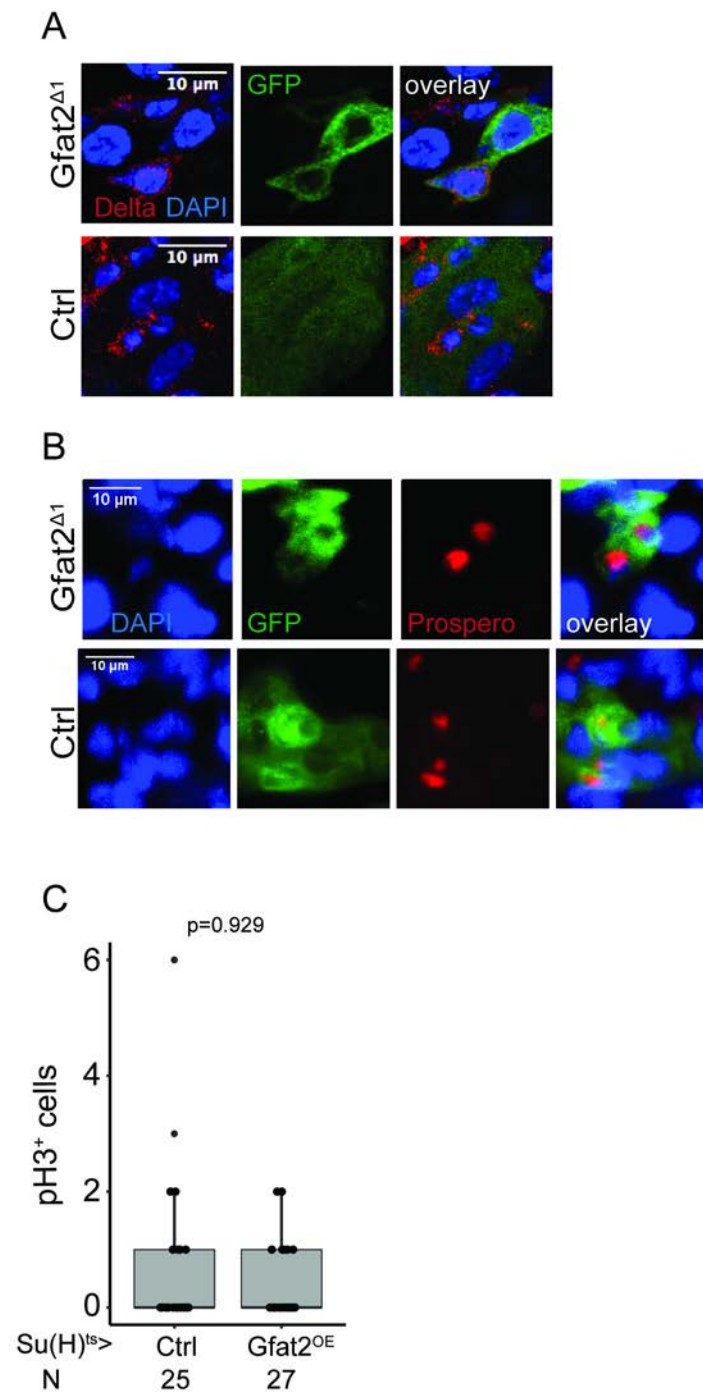

Figure S2. ISCs of the *gfat2<sup>Δ1</sup>* intestinal clones are viable and able to undergo asymmetric cell divisions and EE lineage differentiation. Related to Figure 2.

(A) *gfat2<sup>Δ1</sup>* and control MARCM clones stained with the ISC marker anti-Delta antibody 14 days after clone induction. (B) *gfat2<sup>Δ1</sup>* and control MARCM clones stained with the EE marker anti-Prospero 7 days after clone induction. (C) Overexpression of Gfat2 by the Su(H)-Gal4<sup>ts</sup> driver does not change midgut mitotic index. Quantification of the pH3 positive cells from Su(H)-Gal4<sup>ts</sup>>control and Esg-Gal4<sup>ts</sup>>UAS-Gfat2 intestines. P-values are calculated by Wilcoxon rank-sum test.

FIGURE S3 related to figure 3

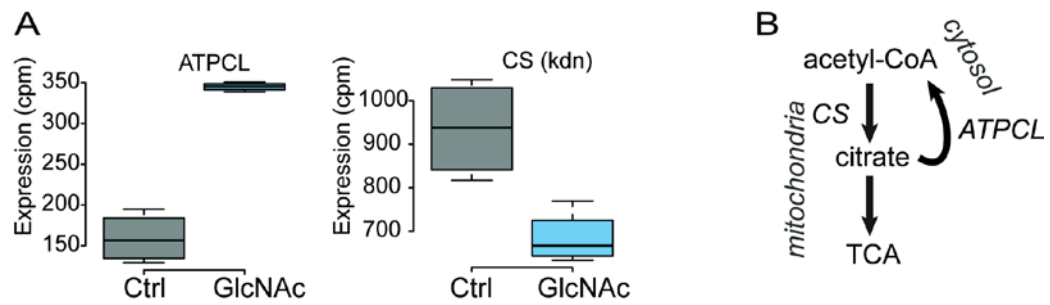

**Figure S3. HBP induced transcriptional changes in genes involved in citrate metabolism. Related to Figure 3.**

(A) mRNA expressions (counts per million, cpm) of ATP citrate lyase (ATPCL) and Citrate synthase (CS) (kdn) on Ctrl vs. GlcNAc diet. (B) Schematics of the role of CS and ATPCL in citrate metabolism driving the activities of TCA cycle and fatty acid biosynthesis, respectively.

FIGURE S4 related to figure 4

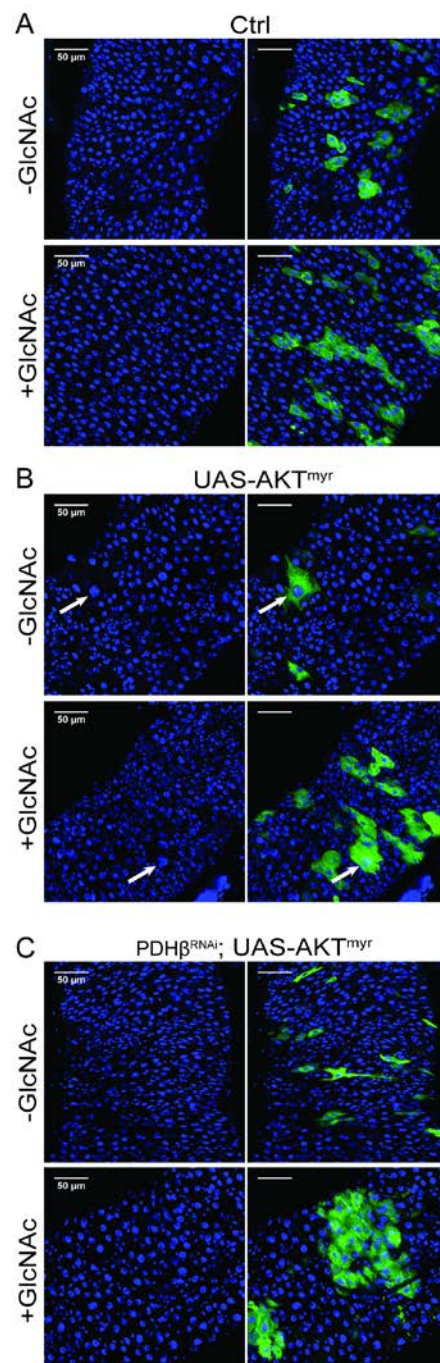

**Figure S4. The regulatory output of Akt<sup>myr</sup> expression in intestinal MARCM clones is determined by dietary GlcNAc and pyruvate metabolism. Related to Figure 4.**

Midgut MARCM clones of control (A), UAS-Akt<sup>myr</sup> (B) and PDH<sup>β</sup><sup>RNAi</sup>; UAS-Akt<sup>myr</sup> (C) with or without dietary GlcNAc. Arrows in (B) point to enlarged cells.

**Table S3. Number of samples used in the clonal experiments. Related to Figures 1, 2, 3 & 4**

| Figure | Genotype                                | Diet          | N guts | N clones |
|--------|-----------------------------------------|---------------|--------|----------|
| 1D     | MARCM>Ctrl                              | 1x -GlcNAc    | 12     | 209      |
| 1D     | MARCM>Ctrl                              | 1x +GlcNAc    | 14     | 224      |
| 1D     | MARCM>Ctrl                              | 0.25x -GlcNAc | 14     | 209      |
| 1D     | MARCM>Ctrl                              | 0.25x +GlcNAc | 11     | 146      |
| 2F     | MARCM>Ctrl                              | 1x -GlcNAc    | 12     | 242      |
| 2F     | MARCM>Gfat2 <sup>Δ1</sup>               | 1x -GlcNAc    | 10     | 176      |
| 2F     | MARCM>Gfat2 <sup>Δ1</sup>               | 1x +GlcNAc    | 11     | 152      |
| 2F     | MARCM>UAS-Gfat2; Gfat2 <sup>Δ1</sup>    | 1x -GlcNAc    | 7      | 92       |
| 2G     | MARCM>Ctrl                              | 1x -GlcNAc    | 12     | 216      |
| 2G     | MARCM>Ctrl                              | 0.25x -GlcNAc | 8      | 136      |
| 2G     | MARCM>UAS-Gfat2                         | 1x -GlcNAc    | 14     | 297      |
| 2G     | MARCM>UAS-Gfat2                         | 0.25x -GlcNAc | 14     | 252      |
| 3F     | MARCM>Ctrl                              | 0.25x -GlcNAc | 10     | 217      |
| 3F     | MARCM>Ctrl                              | 0.25x +GlcNAc | 9      | 136      |
| 3F     | MARCM>PDH $\alpha$ RNAi                 | 0.25x -GlcNAc | 11     | 187      |
| 3F     | MARCM>PDH $\alpha$ RNAi                 | 0.25x +GlcNAc | 11     | 177      |
| 3F     | MARCM>PDH $\beta$ RNAi                  | 0.25x -GlcNAc | 9      | 177      |
| 3F     | MARCM>PDH $\beta$ RNAi                  | 0.25x +GlcNAc | 9      | 141      |
| 3F     | MARCM>LDH RNAi                          | 0.25x -GlcNAc | 8      | 146      |
| 3F     | MARCM>LDH RNAi                          | 0.25x +GlcNAc | 10     | 169      |
| 4A     | MARCM>Ctrl                              | 0.25x -GlcNAc | 12     | 210      |
| 4A     | MARCM>Ctrl                              | 1x -GlcNAc    | 14     | 214      |
| 4A     | MARCM>Gfat2 <sup>Δ1</sup>               | 0.25x -GlcNAc | 13     | 224      |
| 4A     | MARCM>Gfat2 <sup>Δ1</sup>               | 1x -GlcNAc    | 13     | 251      |
| 4D     | MARCM>Ctrl                              | 1x -GlcNAc    | 10     | 139      |
| 4D     | MARCM>Ctrl                              | 1x +GlcNAc    | 10     | 141      |
| 4D     | MARCM>UAS-InR <sup>DN</sup>             | 1x -GlcNAc    | 9      | 184      |
| 4D     | MARCM>UAS-InR <sup>DN</sup>             | 1x +GlcNAc    | 10     | 110      |
| 4D     | MARCM>UAS-InR <sup>A1325D</sup>         | 1x -GlcNAc    | 11     | 114      |
| 4D     | MARCM>UAS-InR <sup>A1325D</sup>         | 1x +GlcNAc    | 13     | 177      |
| 4D     | MARCM>UAS-InR <sup>adel</sup>           | 1x -GlcNAc    | 12     | 231      |
| 4D     | MARCM>UAS-InR <sup>adel</sup>           | 1x +GlcNAc    | 9      | 140      |
| 4D     | MARCM>UAS-Erk <sup>CA</sup>             | 1x -GlcNAc    | 11     | 152      |
| 4D     | MARCM>UAS-Erk <sup>CA</sup>             | 1x +GlcNAc    | 13     | 176      |
| 4F     | MARCM>Ctrl                              | 1x -GlcNAc    | 10     | 248      |
| 4F     | MARCM>UAS-Akt <sup>myr</sup>            | 1x -GlcNAc    | 10     | 69       |
| 4F     | MARCM>UAS-Gfat2; UAS-Akt <sup>myr</sup> | 1x -GlcNAc    | 10     | 263      |
